# Supplementary material for: The pattern of alternative splicing in lung adenocarcinoma shows novel events correlated with tumorigenesis and immune microenvironment
Source: BMC Pulm Med. 2021 Dec 6;21:400. doi: 10.1186/s12890-021-01776-0 (PMC8647402; doi:10.1186/s12890-021-01776-0)
Supplement: Supplementary file 3 — Additional file 3. File 1. Highly expressed DEAS events in the immune group. [file 12890_2021_1776_MOESM3_ESM.xlsx]

## Sheet: Supplement file 1
gene	conMean	treatMean	logFC	pValue	fdr
SYS1|59524|AP	0.0940237	0.190845	1.0213	6.7e-17	7.97e-15
PTPN6|20023|AP	0.421867	0.658618	0.642655	1.54e-46	7.86e-43
SCNM1|7563|AP	0.0490082	0.116606	1.25055	1.97e-35	1.53e-32
CECR1|60973|AP	0.386083	0.623433	0.691324	2.59e-20	4.91e-18
ARGLU1|26231|AP	0.05768	0.0892591	0.629928	2.69e-06	5.84e-05
MKL1|62349|AP	0.111572	0.252927	1.18075	8.08e-36	7.88e-33
ACSS2|59036|AP	0.0686644	0.163439	1.25112	2.22e-15	2.11e-13
SUPT4H1|42661|AP	0.213501	0.310392	0.539846	3.72e-19	6.25e-17
SLC35A2|89035|AT	0.0681906	0.0996087	0.546698	7.39e-17	8.7e-15
AMPD3|14346|AP	0.403133	0.57019	0.500185	1.13e-26	3.74e-24
MCF2L|26317|AP	0.247691	0.359773	0.538546	2.38e-12	1.48e-10
LIMS1|54886|AP	0.0459837	0.0800289	0.7994	3.07e-19	5.19e-17
DNMT3A|52857|AT	0.0703506	0.111894	0.669501	3.27e-21	6.76e-19
RASSF1|65017|AP	0.0708816	0.119992	0.759458	1.43e-20	2.79e-18
PLEKHA1|13355|ES	0.144643	0.228426	0.659236	3.48e-15	3.25e-13
PTPN4|55141|AP	0.0858962	0.214285	1.31886	3.45e-16	3.7e-14
NADK|228|AP	0.288148	0.453954	0.655734	3.79e-30	1.62e-27
TNFRSF13B|39449|AT	0.213895	0.368913	0.786381	2.63e-18	3.76e-16
MIB2|191|RI	0.0747995	0.106676	0.512129	1.47e-05	0.000250855
MAZ|35941|AT	0.0517041	0.0824702	0.673596	3.11e-08	1.02e-06
PADI4|851|AT	0.14944	0.22522	0.591767	3.15e-08	1.03e-06
MEST|81804|AP	0.121138	0.214838	0.826598	5.42e-13	3.72e-11
IL11RA|86206|AP	0.0687277	0.10613	0.626867	1.63e-05	0.000274228
SORL1|19184|AP	0.0753361	0.12284	0.705371	7.32e-09	2.7e-07
RAPGEF1|87966|AP	0.0468836	0.0757212	0.691614	1.49e-06	3.47e-05
ZNF821|37494|AP	0.0432676	0.0802331	0.89091	8.31e-08	2.52e-06
CAPG|54272|AP	0.304307	0.440083	0.532248	1.4e-23	3.77e-21
ATP2C1|66756|AP	0.382825	0.547528	0.516246	2.42e-13	1.78e-11
DZIP3|66032|AP	0.0865309	0.151714	0.810067	2.48e-08	8.29e-07
ARHGAP27|41961|AP	0.298818	0.501356	0.746567	1.91e-28	6.98e-26
FAM107B|10823|AP	0.0382394	0.0681374	0.833385	5.04e-10	2.22e-08
UPB1|61404|AT	0.369097	0.523661	0.504634	1.69e-15	1.64e-13
TRAF2|88232|AP	0.0767422	0.113665	0.566701	2.85e-08	9.41e-07
WIPF1|56028|AP	0.290457	0.433509	0.577735	2.24e-18	3.3e-16
BANK1|70097|AP	0.0595702	0.0957357	0.684466	6.78e-06	0.000129514
CRLF2|88358|AT	0.211952	0.315589	0.574304	8.91e-09	3.24e-07
OLFM2|47444|AP	0.128861	0.259327	1.00895	3.04e-16	3.3e-14
CCSER2|12409|ES	0.149623	0.21197	0.502525	3.47e-13	2.46e-11
RPS6KA1|1281|AP	0.219951	0.446403	1.02116	2.59e-45	1.06e-41
LIMK1|80060|AP	0.120787	0.242734	1.00691	6.27e-33	3.38e-30
SRBD1|53457|AP	0.0590085	0.126969	1.10548	1.35e-20	2.66e-18
MTMR1|90356|ES	0.257323	0.369576	0.52229	2.24e-11	1.24e-09
FLVCR2|28507|AP	0.0701012	0.119033	0.763851	5.62e-15	5.07e-13
MGAT1|75022|AP	0.269126	0.413475	0.619521	4.36e-34	2.79e-31
LNPEP|72875|AP	0.0393376	0.0916043	1.21951	8.98e-10	3.72e-08
CHID1|13801|AP	0.0352363	0.0612405	0.797425	1.88e-12	1.19e-10
PLEKHA1|13354|ES	0.0659427	0.099132	0.588138	1.26e-09	5.13e-08
PYHIN1|8390|AT	0.206814	0.392523	0.92444	4.61e-37	4.97e-34
FYN|77271|AP	0.0571074	0.100409	0.81414	9.69e-12	5.46e-10
FAM153B|74626|AT	0.0884503	0.129221	0.546904	6.09e-05	0.000827137
SORBS2|71370|AP	0.0871715	0.150322	0.786132	5.96e-09	2.24e-07
NR1H3|15695|AP	0.266604	0.406649	0.60909	7.82e-20	1.38e-17
PAK1|17950|AP	0.395897	0.575647	0.540059	1.23e-24	3.64e-22
RGS12|68637|AP	0.109353	0.185968	0.766059	2.75e-09	1.08e-07
SNX10|79044|AP	0.0557278	0.0834309	0.582184	4.71e-06	9.52e-05
SH3BP2|68591|AP	0.0967398	0.141588	0.549517	7.64e-11	3.86e-09
COMMD5|85672|AP	0.149823	0.222831	0.572693	1.32e-22	3.04e-20
SORT1|4009|AP	0.0488497	0.0926773	0.923865	5.15e-15	4.68e-13
FOXN3|28789|AP	0.161408	0.252057	0.643039	6.64e-13	4.48e-11
ARHGEF10L|858|AP	0.375946	0.581759	0.629895	1.69e-28	6.3e-26
SLC25A45|16820|AP	0.149188	0.215104	0.527903	1.33e-11	7.44e-10
AP1B1|61603|ES	0.183576	0.306444	0.739246	9.76e-38	1.18e-34
ST6GAL1|68067|AP	0.0588953	0.0856111	0.539645	1.47e-05	0.000250855
TANK|55731|AP	0.211386	0.363719	0.782942	1.98e-29	8.09e-27
DTNB|52861|AP	0.0279129	0.0746063	1.41837	5.76e-19	9.44e-17
ANKRD65|167|ES	0.112206	0.164103	0.548448	0.000605709	0.0056321
NCK1|66941|AP	0.212597	0.335138	0.656633	3.05e-20	5.73e-18
NEDD9|75337|AP	0.050602	0.0901802	0.833615	7.47e-16	7.65e-14
FGD4|21027|AP	0.157907	0.263091	0.736487	3.84e-13	2.69e-11
RUNX1|60501|AP	0.0650376	0.113107	0.798349	7.13e-16	7.37e-14
LAS1L|89321|ES	0.107505	0.164009	0.609373	2.56e-18	3.7e-16
TMEM176B|82255|AP	0.159138	0.237772	0.579297	6.59e-13	4.47e-11
DCTPP1|36111|AP	0.0665041	0.105494	0.665644	3.15e-12	1.91e-10
SOD2|78301|AT	0.0404637	0.0688355	0.766526	4.76e-12	2.8e-10
SPTBN1|53576|AP	0.103389	0.149761	0.534583	4.91e-05	0.000689078
ACOT7|390|AP	0.12642	0.264704	1.06615	8.07e-27	2.71e-24
C15orf27|31921|AT	0.167473	0.247375	0.562773	2.74e-14	2.2e-12
TMEM63B|76352|AP	0.251961	0.369972	0.554217	1.44e-17	1.84e-15
ZNF106|30163|AP	0.0778746	0.123545	0.665808	1.16e-08	4.14e-07
C7orf49|81875|AD	0.185895	0.310234	0.738867	1.85e-10	8.75e-09
CASKIN2|43451|AP	0.0449484	0.0642036	0.514385	1.43e-05	0.000245294
GALNTL6|71169|AT	0.0404381	0.0845214	1.0636	7.91e-05	0.00102957
PPARG|63413|AP	0.152362	0.227672	0.579454	1.26e-05	0.000219487
RASSF1|65019|AP	0.0509271	0.0723185	0.505931	2.17e-08	7.32e-07
ZNF185|90395|AP	0.10645	0.223186	1.06808	1.57e-23	4.13e-21
PFKFB4|64704|AP	0.0834726	0.140133	0.74742	2.09e-07	5.84e-06
SLC19A1|60877|AP	0.0434435	0.0925098	1.09047	3.63e-08	1.17e-06
LIMCH1|69112|AP	0.0603337	0.134992	1.16184	1.12e-12	7.38e-11
CELF2|10732|AP	0.159897	0.304311	0.928404	1.92e-18	2.87e-16
SIGIRR|13650|AP	0.280989	0.457469	0.703158	3.31e-33	1.88e-30
SUPT4H1|42666|AD	0.0523898	0.0754554	0.526338	3.05e-14	2.43e-12
SQRDL|30458|AP	0.0720494	0.146781	1.02661	6.52e-20	1.17e-17
TC2N|28883|AP	0.146242	0.352353	1.26866	1.48e-35	1.26e-32
CCM2|79582|AP	0.0535819	0.0913231	0.769234	4.47e-23	1.09e-20
FYN|77272|AP	0.188437	0.310425	0.720159	2.89e-15	2.71e-13
LHFPL2|72609|AP	0.0862879	0.142165	0.720334	9.19e-10	3.79e-08
SMCO4|18300|AP	0.181562	0.424194	1.22426	3.4e-43	6.96e-40
CATSPERD|46924|AT	0.0924322	0.158364	0.776777	0.000276539	0.00295982
PTPRE|13457|AP	0.341015	0.499161	0.549667	1.56e-16	1.77e-14
ERP27|20562|AP	0.0466708	0.0952142	1.02866	5.18e-06	0.000103337
ARHGEF11|8338|ES	0.346499	0.531123	0.616193	4.65e-35	3.22e-32
CLASP2|63869|AP	0.064684	0.104749	0.695458	1.73e-08	5.95e-07
C7orf49|81873|AD	0.115848	0.208625	0.848681	1.37e-10	6.71e-09
PKN1|47976|AP	0.123359	0.267675	1.11762	6.7e-35	4.42e-32
RPS6KA1|1282|AP	0.0673004	0.10246	0.606378	2.58e-13	1.88e-11
TNIP1|74126|AP	0.208385	0.32625	0.646725	6.58e-17	7.87e-15
CDHR4|64918|AT	0.0954547	0.14631	0.616135	0.000432475	0.00426333
NPNT|70261|ES	0.134064	0.191385	0.51355	1.16e-08	4.12e-07
EXOC6|12541|AP	0.0675486	0.133611	0.984041	4.22e-12	2.52e-10
MKL2|34068|AP	0.118701	0.176016	0.568374	2.9e-07	7.84e-06
MYO5A|30660|ES	0.278936	0.400244	0.520943	2.97e-18	4.11e-16
DENND2D|4141|AP	0.24586	0.467944	0.928501	2.41e-41	3.79e-38
NAV2|14695|AP	0.0437387	0.0640503	0.550293	7.65e-05	0.00100404
SLC11A2|21725|AP	0.066628	0.13408	1.00889	4.49e-19	7.47e-17
ARHGEF1|50101|ES	0.23603	0.354368	0.58628	2.87e-18	3.99e-16
NINJ2|19604|AP	0.0508302	0.0784686	0.626429	2.39e-12	1.48e-10
RALGDS|88016|AP	0.116449	0.202433	0.797745	1e-18	1.61e-16
ADRA1A|83140|AT	0.027818	0.0634702	1.19006	0.000464294	0.00453983
CNKSR1|1232|AP	0.0418527	0.0683075	0.706724	6.69e-06	0.000128048
LIMS1|54881|AP	0.103972	0.188847	0.86102	9.46e-25	2.85e-22
LEF1|70287|AP	0.151988	0.230504	0.60084	7.15e-14	5.47e-12
CENPM|62466|AP	0.124539	0.189662	0.606828	2.18e-06	4.87e-05
FBLN5|28888|AP	0.0367835	0.053002	0.526989	1.85e-07	5.22e-06
CTNND1|15942|ES	0.0991767	0.147354	0.571212	3.26e-05	0.000493105
CTNND1|16002|ES	0.0471444	0.0767394	0.70288	1.72e-06	3.95e-05
SEPT9|43714|AP	0.0293224	0.0708442	1.27264	4.72e-35	3.22e-32
SVIL|11114|ES	0.04095	0.0583547	0.510987	0.000157415	0.00182921
SEMA4A|8190|AP	0.0719286	0.106661	0.568401	1.52e-06	3.53e-05
CHI3L2|4144|AP	0.224956	0.337626	0.585782	4.35e-08	1.38e-06
IL12RB1|48393|AT	0.196819	0.283374	0.525838	7.57e-32	3.69e-29
DRAP1|16950|AP	0.0408862	0.0639025	0.644258	1.65e-18	2.48e-16
C20orf96|58436|AP	0.106893	0.15405	0.52723	1.86e-05	0.000304817
VSTM1|51760|ME	0.0800261	0.165217	1.04582	3e-08	9.86e-07
MACF1|1888|ES	0.241862	0.37574	0.635553	5.43e-15	4.92e-13
SH3KBP1|88642|AP	0.181255	0.313418	0.790064	1.25e-16	1.43e-14
TTC39C|44850|AP	0.0526951	0.101855	0.95077	3.95e-13	2.76e-11
ABI1|11048|ES	0.212086	0.332282	0.647755	1.65e-30	7.34e-28
GPR56|36573|AP	0.0404494	0.0716777	0.825406	1.7e-10	8.15e-09
GPR35|58298|AP	0.251719	0.369375	0.553275	2.46e-07	6.78e-06
PRKAR1B|78509|AP	0.0500892	0.078492	0.648045	9.63e-05	0.00121444
SPATA13|25473|AP	0.194396	0.318809	0.713695	1.12e-18	1.73e-16
CCDC108|57577|AT	0.115122	0.18088	0.65187	4.79e-07	1.25e-05
SYK|86819|AP	0.0502059	0.0804482	0.680203	0.000114482	0.00140698
PTK2|85291|AP	0.101586	0.152414	0.585298	3.06e-10	1.4e-08
E2F5|84324|AP	0.139296	0.283864	1.02705	3.23e-17	3.98e-15
CEP135|69338|AT	0.0466078	0.0669223	0.521917	8.25e-05	0.0010697
CHID1|13803|AP	0.068803	0.150401	1.12827	1.89e-26	6.06e-24
